# Supplementary material
Source: ML conference proceedings conference paper supplement (https://openaccess.thecvf.com/content/ICCV_2019/html/Saragadam_Micro-Baseline_Structured_Light_ICCV_2019_paper.html)
Supplement: Supplementary file 1 [file Saragadam_Micro-Baseline_Structured_Light_ICCV_2019_supplemental.pdf]

Archive with 4 entries (4 files):
- tech_report.pdf
- fig8_depth.avi
- fig8_scene.avi
- README.txt
