# Supplementary material
Source: ML conference proceedings conference paper supplement (https://openaccess.thecvf.com/content/ICCV_2019/html/Saragadam_Micro-Baseline_Structured_Light_ICCV_2019_paper.html)
Supplement: Supplementary file 1 [file Saragadam_Micro-Baseline_Structured_Light_ICCV_2019_supplemental.pdf › README.txt]

Title: Micro-baseline Structured Light
Authors: Vishwanath Saragadam, Jian Wang, Mohit Gupta, and Shree Nayar

Contents of this zip file:
1. tech_report.pdf: A 5-page PDF with details on MSL algorithm, more real experiments and proofs for proposition 5.1 and discussions about 7.1 in main paper.
2. fig8_scene.avi: Video sequence for the scene in Figure 8 in the main paper. The video was resized to half the original dimensions due to file size constraints.
3. fig8_depth.avi: Video sequence for the depth of scene in Figure 8 in the main paper. The video was resized to half the original dimensions due to file size constraints.
