# Supplementary material
Source: ML conference proceedings conference paper supplement (https://openaccess.thecvf.com/content/ICCV_2019/html/Saragadam_Micro-Baseline_Structured_Light_ICCV_2019_paper.html)
Supplement: Supplementary file 1 [file Saragadam_Micro-Baseline_Structured_Light_ICCV_2019_supplemental.pdf › tech_report.pdf]

# Micro-baseline Structured Light (Supplementary Material)

Vishwanath Saragadam\*, Jian Wang, Mohit Gupta, and Shree Nayar  
NYC Research Lab, Snap Inc.

vishwanathsrvc@cmu.edu, {jwang4, snayar}@snap.com, mohitg@cs.wisc.edu

## 1. Overview

Structured light (SL) on small form-factor devices have tightly coupled constraints of small baseline, limited hardware complexity and low computational resources. We propose Micro-baseline Structured Light (MSL), a novel approach that needs only a single pattern, with fast decoding. The main paper introduced the algorithm and discussed choice of various system parameters, based on which a prototype was developed to experimentally examine its practicality. The goal of this supplementary document is to provide (1) fast implementation of MSL algorithm, (2) more real-world results, and (3) theoretical derivations of Proposition 5.1 and discussions of Section 7.1 in the main paper.

## 2. Fast Implementation of MSL

By assuming locally constant disparity and albedo, we have the following system of linear equations within a small  $n \times n$  window

$$\begin{aligned} I(x_l, y_m) &= \rho_0 P(x_l, y_m) + \tilde{u}_0 P'(x_l, y_m) \\ \text{where } x_c - n/2 &\leq x_l \leq x_c + n/2, \\ y_c - n/2 &\leq y_m \leq y_c + n/2 \\ \implies \mathbf{i}_c &= \rho_0 \mathbf{p} + \tilde{u}_0 \mathbf{p}_x, \end{aligned}$$

where  $(x_c, y_c)$  is the central pixel in the window,  $\mathbf{i}_c$  is vector of camera measurements around this pixel,  $\mathbf{p}$  is vector of projector intensities, and  $\mathbf{p}_x$  is vector of gradient of the pattern. Using the above equations, the least squares solution yields the following expression

$$\begin{pmatrix} \mathbf{p}^\top \mathbf{i}_c \\ \mathbf{p}_x^\top \mathbf{i}_c \end{pmatrix} = \begin{pmatrix} \|\mathbf{p}\|^2 & \mathbf{p}^\top \mathbf{p}_x \\ \mathbf{p}_x^\top \mathbf{p} & \|\mathbf{p}_x\|^2 \end{pmatrix} \begin{pmatrix} \rho_0 \\ \tilde{u}_0 \end{pmatrix},$$

and disparity at  $(x_c, y_c)$  is recovered as

$$u(x_c, y_c) = \frac{\tilde{u}_0}{\rho_0} = \frac{\|\mathbf{p}\|^2 (\mathbf{p}_x^\top \mathbf{i}_c) - (\mathbf{p}^\top \mathbf{p}_x) (\mathbf{p}^\top \mathbf{i}_c)}{\|\mathbf{p}_x\|^2 (\mathbf{p}^\top \mathbf{i}_c) - (\mathbf{p}^\top \mathbf{p}_x) (\mathbf{p}_x^\top \mathbf{i}_c)}.$$

Let  $I_{\|\mathbf{p}\|^2}$  be an image where each pixel stores  $\|\mathbf{p}\|^2$  around its neighbor. We similarly compute the images  $I_{\mathbf{p}^\top \mathbf{p}_x}$ ,  $I_{\|\mathbf{p}_x\|^2}$ ,  $I_{\mathbf{p}^\top \mathbf{i}}$ , and  $I_{\mathbf{p}_x^\top \mathbf{i}}$ . The disparity map of the scene  $I_u$  can then be computed as,

$$I_u = \frac{I_{\|\mathbf{p}\|^2} \odot I_{\mathbf{p}_x^\top \mathbf{i}} - I_{\mathbf{p}^\top \mathbf{p}_x} \odot I_{\mathbf{p}^\top \mathbf{i}}}{I_{\|\mathbf{p}_x\|^2} \odot I_{\mathbf{p}^\top \mathbf{i}} - I_{\mathbf{p}^\top \mathbf{p}_x} \odot I_{\mathbf{p}_x^\top \mathbf{i}}}, \quad (1)$$

where  $\odot$  represents element-wise product, and division is done at each pixel. Notice that computation of  $I_{\|\mathbf{p}\|^2}$  and other such images have a large overlap for adjacent pixel. We will focus on how  $I_{\|\mathbf{p}\|^2}$  can be computed efficiently. This computation is then extended to all images.

The dot product  $\|\mathbf{p}\|^2$  can be concisely written as,

$$I_{\|\mathbf{p}\|^2} = \text{boxfilt}(P \odot P, n), \quad (2)$$

where  $\text{boxfilt}(\cdot, n)$  is a box filtering operation with window size  $n \times n$ . The box filtering can be efficiently implemented using integral image approach [1] which makes the computation independent of window size. A further speed up is achieved by pre-computing the scene-independent images  $I_{\|\mathbf{p}\|^2}$ ,  $I_{\|\mathbf{p}_x\|^2}$ , and  $I_{\mathbf{p}^\top \mathbf{p}_x}$ . Hence, estimation of disparity requires only computation of  $I_{\mathbf{p}^\top \mathbf{i}}$  and  $I_{\mathbf{p}_x^\top \mathbf{i}}$ .

**Computations with guide image.** The relevant equations for computing disparity with guided MSL approach is,

$$\begin{aligned} I(x_l, y_m) &= \alpha_0 G(x_l, y_m) (P(x_l, y_m) + u_0 P'(x_l, y_m)) \\ \frac{I(x_l, y_m)}{G(x_l, y_m) + \epsilon} &= \alpha_0 (P(x_l, y_m) + u_0 P'(x_l, y_m)) \\ \hat{I}(x_l, y_m) &= \alpha_0 P(x_l, y_m) + (\alpha_0 u_0) P'(x_l, y_m), \end{aligned}$$

where  $\epsilon$  is a small constant added for numerical stability. By replacing  $I(x, y)$  with  $\hat{I}(x, y) = I(x, y) / (G(x, y) + \epsilon)$ , we obtain an equation that is similar to MSL without guided image, and hence can be solved efficiently.

The overall algorithm for guided MSL is detailed in Alg. 1. Our optimized implementation of guided MSL required 27ms of decoding time on an Android phone for a 3 megapixel image.

\*This work was done at Snap's NYC Research Lab and supported by Snap Inc. Vishwanath is with the Department of Electrical and Computer Engineering at Carnegie Mellon University, and Mohit Gupta is with the Department of Computer Science at the University of Wisconsin-Madison.

**Algorithm 1 Guided MSL algorithm.** MSL and its guided version can be efficiently implemented by pre-computing scene-independent entries of MSL matrix, box filtering and element-wise operations.

**Pre-compute:** given pattern image  $P$ , derivative of pattern  $P_x$ , window size  $n$ , compute matrices of dot products

- p1:  $I_{\|P\|^2} = \text{boxfilt}(P \odot P, n)$   
p2:  $I_{\|P_x\|^2} = \text{boxfilt}(P_x \odot P_x, n)$   
p3:  $I_{P^\top P_x} = \text{boxfilt}(P \odot P_x, n)$

**Input:** image of the scene with pattern  $I$ , guide image  $G$

- 1:  $I = \frac{I - G}{G + \epsilon}$   
2:  $I_{P^\top I} = \text{boxfilt}(P \odot I, n)$   
3:  $I_{P_x^\top I} = \text{boxfilt}(P_x \odot I, n)$   
4:  $I_u = \frac{I_{\|P\|^2} \odot I_{P_x^\top I} - I_{P^\top P_x} \odot I_{P^\top I}}{I_{\|P_x\|^2} \odot I_{P^\top I} - I_{P^\top P_x} \odot I_{P_x^\top I}}$

**Output:** disparity map  $I_u$

### 3. Real Experiments

**Effect of pattern choice.** We provided an intuitive explanation for our pattern choice being a triangular pattern. Figure 1 compares accuracy of computed depth of the scene by projecting periodic ramp, sinusoid and triangular pattern of  $20px$  period. Ramp was most inaccurate due to discontinuity, which resulted in violation of first order approximation. Triangular pattern was the most accurate, as it does not have discontinuities and has approximately constant derivative. The observations are in line with our intuition stated in the main paper about triangular pattern and hence used it for all our experiments.

**MSL in various scenarios.** Figure 2 shows some more experiments we captured with our setup for various scenarios using different periods. The first two experiments with pillow and paper bag demonstrate applications which require large depth range but limited spatial variations. This required a large pattern period to ensure an unambiguous solution. The second two rows (breakfast and cleaners) are made of small objects with more spatial variations, which required a small period of  $10px$ . The last three rows (toys and Mayan bas-relief) consist of shallow depth but small depth variations which required a small period to retain spatial information and hence we used  $6px$  period.

### 4. Theoretical Discussions

We discussed two theoretical contributions in the main paper. The first contribution was about the nature of pattern that ensured the MSL matrix was invertible. In this section, we layout a proof of Proposition 5.1 in the main paper.

The second contribution was regarding locally linear geometry. We stated that the estimate of MSL equation is accurate for locally linear geometry if and only if the deriva-

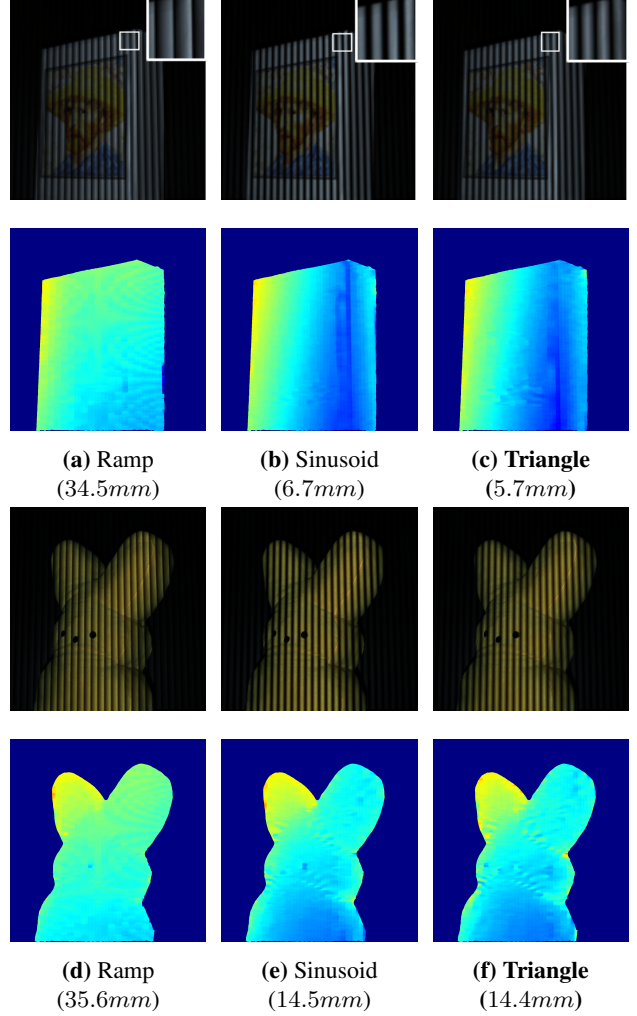

**Figure 1: Effect of pattern.** We captured data by projecting periodic ramp, sinusoid and triangular pattern of  $20px$  period. Estimate with ramp was most inaccurate due to discontinuity in the pattern. On an average, we found the triangular pattern to be more accurate than the sinusoidal pattern, and hence we used it in all our experiments.

tive of pattern has constant magnitude. We support our claim with a rigorous proof.

#### 4.1. Condition for invertibility

**Proposition 4.1** (Necessary and sufficient condition for invertibility). *The MSL matrix is invertible if and only if the projected pattern is not a constant or an exponential pattern of the form  $P(x, y) = c_1 e^{c_2 x}$ .*

#### Proof

**Case 1: Pattern is constant** We either have  $\mathbf{p} = \mathbf{0}$ , in which case, rank of the matrix is zero, or we have  $\mathbf{p} = c\mathbf{1}$ ,

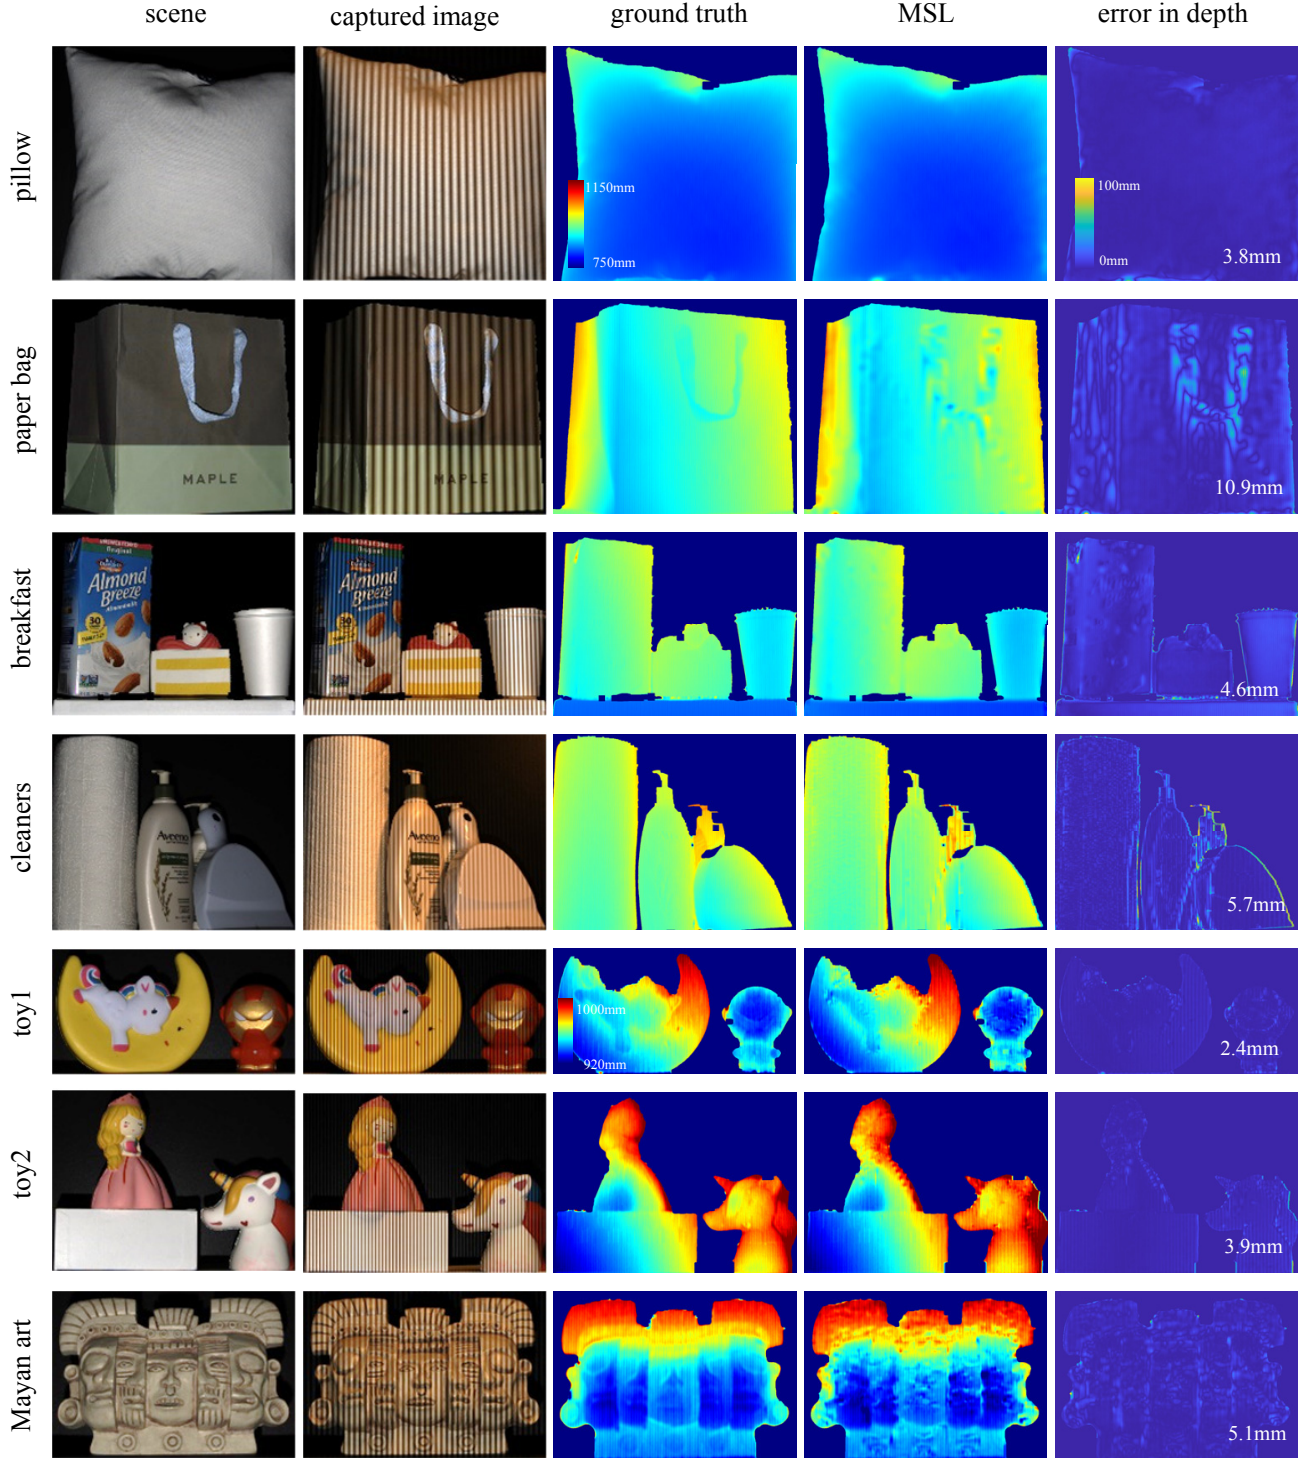

**Figure 2: MSL in various scenarios.** We show several more examples of MSL. “Pillow” and “paper bag” were captured with  $20px$  period, “breakfast” and “cleaners” with  $10px$ , and two “toy” and “Mayan art” with  $6px$ . A larger period captures wider range of depths while having lower spatial resolution, ideal for large planar or curved objects with few details. On the other hand, smaller period captures smaller range of depth but is capable of resolving more spatial features. Finally the smallest pattern of  $6px$  can be used for capturing small variations in depth, such as small toys and bas-reliefs. Ground truth is obtained by phase shifting with five different frequencies.

in which case,  $\mathbf{p}_x = \mathbf{0}$ . Then rank of the matrix is 1.

**Case 2: Pattern is exponential** In this case,  $P(x, y) = c_1 e^{c_2 x}$ . Then we have,

$$P'(x, y) = c_1 c_2 e^{c_2 x}. \quad (3)$$

To keep analysis simple, we look at a row spanning  $n$  pixels instead of all pixels in  $n \times n$  window. Since the pattern is constant along y-axis, analysis along any one row will suffice. In that case,

$$\begin{aligned} \mathbf{p} &= (c_1 e^{c_2 x_1}, \dots, c_1 e^{c_2 x_n})^\top \\ \mathbf{p}_x &= (c_1 c_2 e^{c_2 x_1}, \dots, c_1 c_2 e^{c_2 x_n})^\top \\ \Rightarrow \|\mathbf{p}\|^2 &= c_1^2 \sum_{k=0}^{n-1} e^{2c_2 x_k}, \quad \|\mathbf{p}_x\|^2 = c_2^2 c_1^2 \sum_{k=0}^{n-1} e^{2c_2 x_k} \\ \mathbf{p}^\top \mathbf{p}_x &= c_1^2 c_2 \sum_{k=0}^{n-1} e^{2c_2 x_k} \\ \Rightarrow \|\mathbf{p}\|^2 \|\mathbf{p}_x\|^2 - (\mathbf{p}^\top \mathbf{p}_x)^2 &= \dots \\ &= \dots (c_1^2 \cdot c_1^2 c_2^2 - (c_1^2 c_2)^2) \sum_{k=0}^{n-1} e^{2c_2 x_k} \\ &= 0, \quad \square. \end{aligned}$$

## 4.2. MSL estimate for locally linear geometry

Realistic scenes are more accurately modeled as a locally linear disparity instead of constant disparity. We then seek patterns which give an accurate estimate by solving the MSL equation. The solution of MSL equation is unbiased for locally linearly varying disparity if and only if  $P'(x, y) = \pm \text{const}$ . We now give a proof of this statement.

**Proof.** Let  $u(x, y_0) = u_1 + u_2 x + u_3 y_0 = u_4 + u_2 x$  be the disparity along one row within an  $n \times n$  window. Let  $\rho_0 u(x, y_0) = \tilde{u}_4 + \tilde{u}_2 x$ . The local constraint equation,

$$I(x_l, y_0) = \rho_0 P(x_l, y_0) + (\tilde{u}_4 + \tilde{u}_2 x_l) P'(x_l, y_0) \quad (4)$$

We say the estimate of MSL equation is invariant to tilted planes if  $\tilde{u}_0$  is equal to the disparity at the center pixel,  $\tilde{u}_4 + \tilde{u}_2 x_{n/2}$ . The solution is guaranteed to be the average if the pattern has a constant magnitude of derivative.

**Sufficient condition.** We show that a pattern with constant magnitude of derivative ensures invariance to tilted planes as follows:

$$\begin{aligned} \frac{1}{\mathbf{p}_x^\top \mathbf{p}_x} \sum_{k=0}^{n-1} \mathbf{p}_x^2(k) k &= \frac{n+1}{2} \\ \Rightarrow \sum_{k=0}^{n-1} \mathbf{p}_x^2(k) k &= \frac{n+1}{2} \sum_{k=0}^{n-1} \mathbf{p}_x^2(k) \quad \square \quad (5) \end{aligned}$$

**Necessary condition.** Note that disparity at every point in the camera image is estimated using a sliding window. Hence, the invariance has to hold for any window location. This implies that the equation has to hold for any cyclic shifts of  $\mathbf{p}_x^2(k)$ . Hence the complete requirement is the following:

$$\begin{aligned} \sum_{k=0}^{n-1} \mathbf{p}_x^2((k+p)\%n) k &= \frac{n+1}{2} \sum_{k=0}^{n-1} \mathbf{p}_x^2((k+p)\%n) \\ &= \frac{n+1}{2} \sum_{k=0}^{n-1} \mathbf{p}_x^2(k), \end{aligned} \quad (6)$$

where  $p = 0, 1, \dots, n-1$ , which gives  $n$  constraints, for all positions of window. Writing in a matrix form,

$$\begin{pmatrix} \mathbf{p}_x^2(1) & \dots & \mathbf{p}_x^2(n) \\ \vdots & \ddots & \vdots \\ \mathbf{p}_x^2(n) & \dots & \mathbf{p}_x^2(1) \end{pmatrix} \begin{pmatrix} 1 \\ \vdots \\ n \end{pmatrix} = \begin{pmatrix} p_0 \\ \vdots \\ p_0 \end{pmatrix}, \quad (7)$$

where  $p_0 = \frac{n+1}{2} \sum_{k=0}^n \mathbf{p}_x^2(k+p)$ . Let  $H$  be the left hand side matrix. Since it is a circulant matrix we can use Fourier transform property to write it as,  $H = F^\top D_{\mathbf{p}_x^2} F$ , where  $F$  is the DFT matrix, and  $D_{\mathbf{p}_x^2}$  is a diagonal matrix with DFT of  $\mathbf{p}_x^2$ . Multiplying both sides by  $F$ , we get,

$$H \begin{pmatrix} 1 \\ \vdots \\ n \end{pmatrix} = \begin{pmatrix} p_0 \\ \vdots \\ p_0 \end{pmatrix} \quad (8)$$

$$\Rightarrow F^\top D_{\mathbf{p}_x^2} F \mathbf{r} = p_0 \mathbf{1} \quad (9)$$

$$\Rightarrow D_{\mathbf{p}_x^2} (F \mathbf{r}) = p_0 (F \mathbf{1}). \quad (10)$$

The right hand side,  $F \mathbf{1} = (n, 0, 0, \dots, 0)^\top$ . Hence the equation is satisfied *only if*

$$D_{\mathbf{p}_x^2}(k, k) = \begin{cases} \text{constant} & k = 1 \\ 0 & k \neq 1 \end{cases}. \quad (11)$$

This implies that  $\mathbf{p}_x^2(k) = \text{constant}$ ,  $\square$ .

**Choice of pattern.** The proof in previous section implies that the only pattern capable of invariance to tilted planes is an intensity ramp. However, due to small derivative of an intensity ramp, it is not desirable. This motivates our intuitive choice of a periodic symmetric triangular pattern, which has approximately constant derivative, and has large magnitude of derivative.

**Handling discontinuity in derivatives.** A triangular pattern approximates invariance to tilted planes well. However,

at the peak and trough of the triangle, there is a discontinuity in derivative, that reduces approximation accuracy. To counter this effect, we give low weights to data around the peak of triangle, thus reducing its effect. While this reduces the number of pixels used in the window, the overall accuracy of estimate is higher.

## References

- [1] P. Viola, M. Jones, et al. Rapid object detection using a boosted cascade of simple features. *IEEE Intl. Conf. Comp. Vision and Pattern Recognition (CVPR)*, 2001. [1](#)
